# Supplementary material for: Deconvoluting the dual hypoglycemic effect of wedelolactone isolated fromWedelia calendulacea: investigationviaexperimental validation and molecular docking
Source: Royal Society of Chemistry journal article supplement (doi:10.1039/c7ra12568b), 2018-01-01
Supplement: c7ra12568b1.pdf [file c7ra12568b1.pdf]

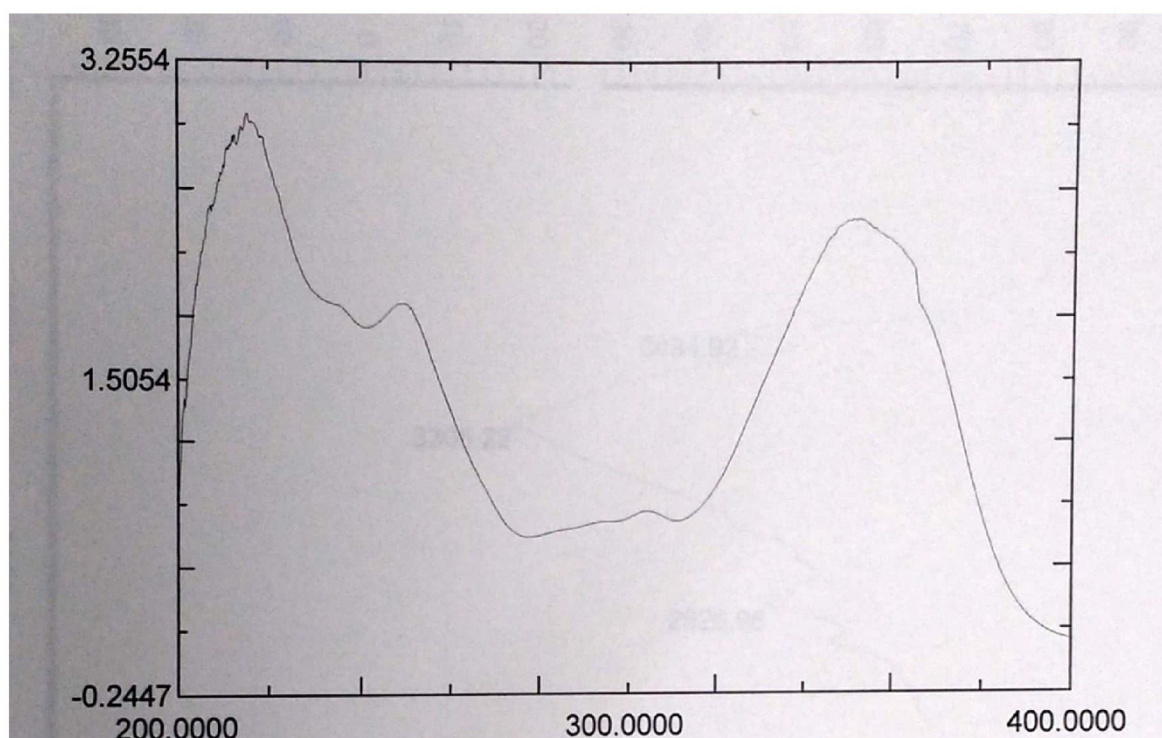

**Supplementary figure 1:** UV spectra of compound

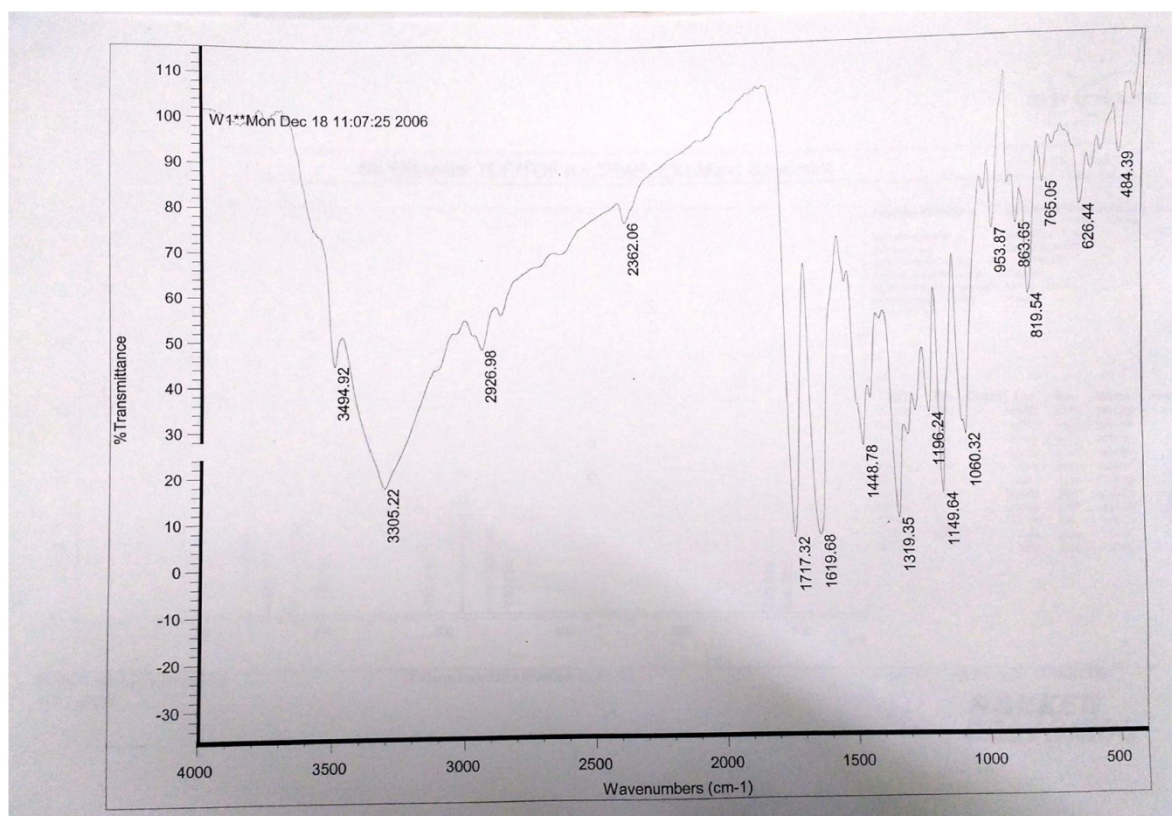

**Supplementary figure 2:** FTIR spectra of compound

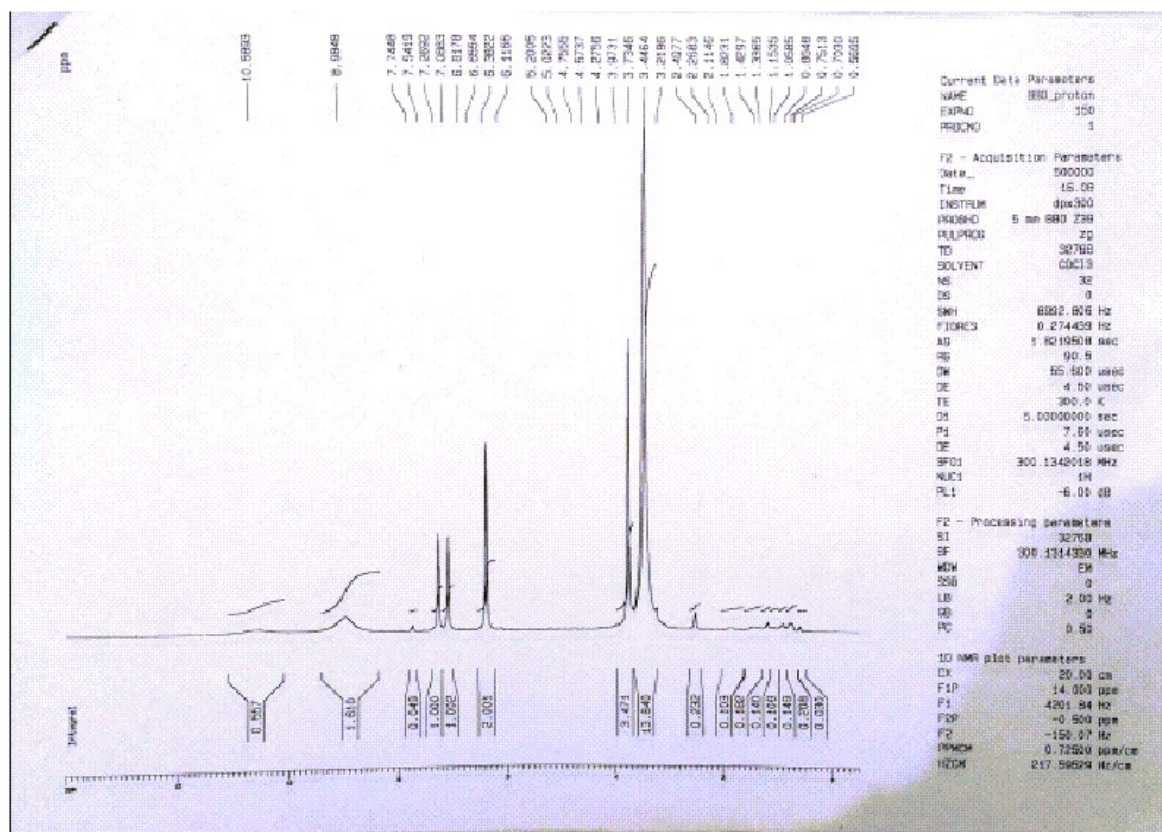

Supplementary figure 3: NMR spectra of compound

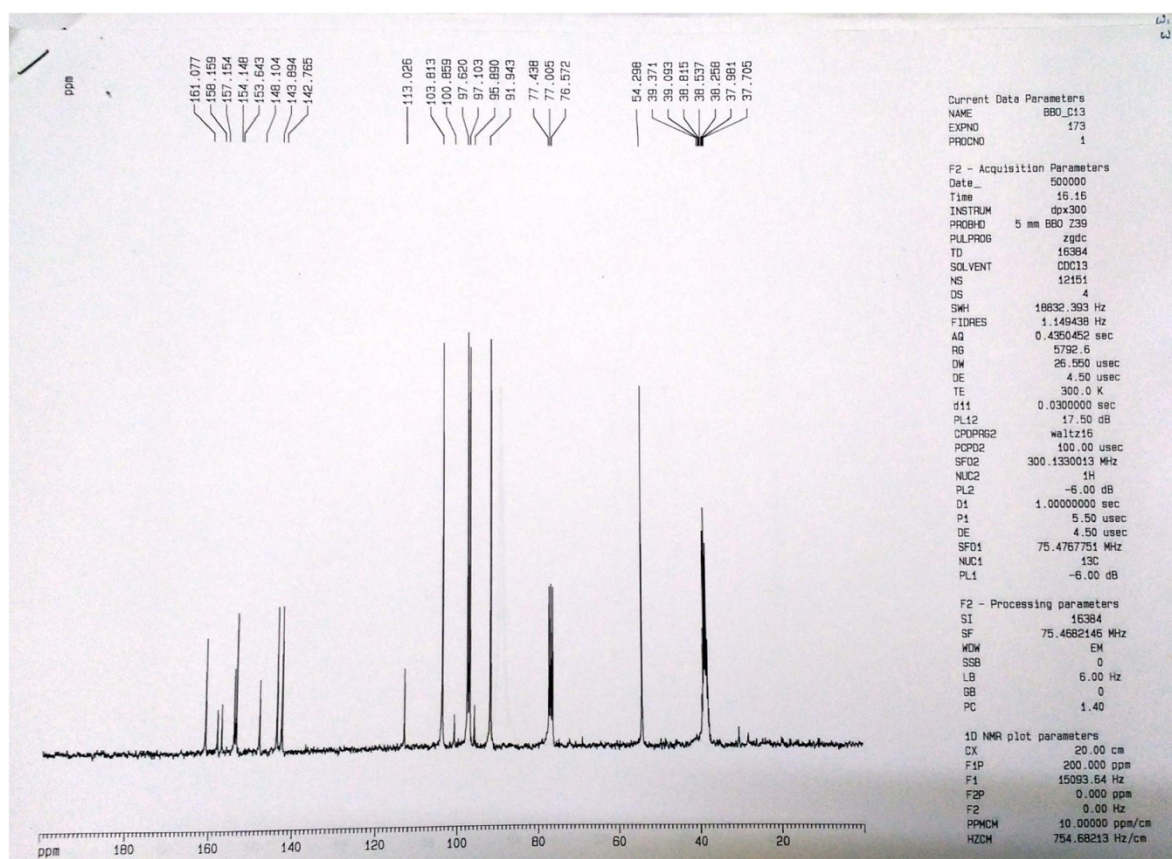

**Supplementary figure 4: NMR spectra of compound**

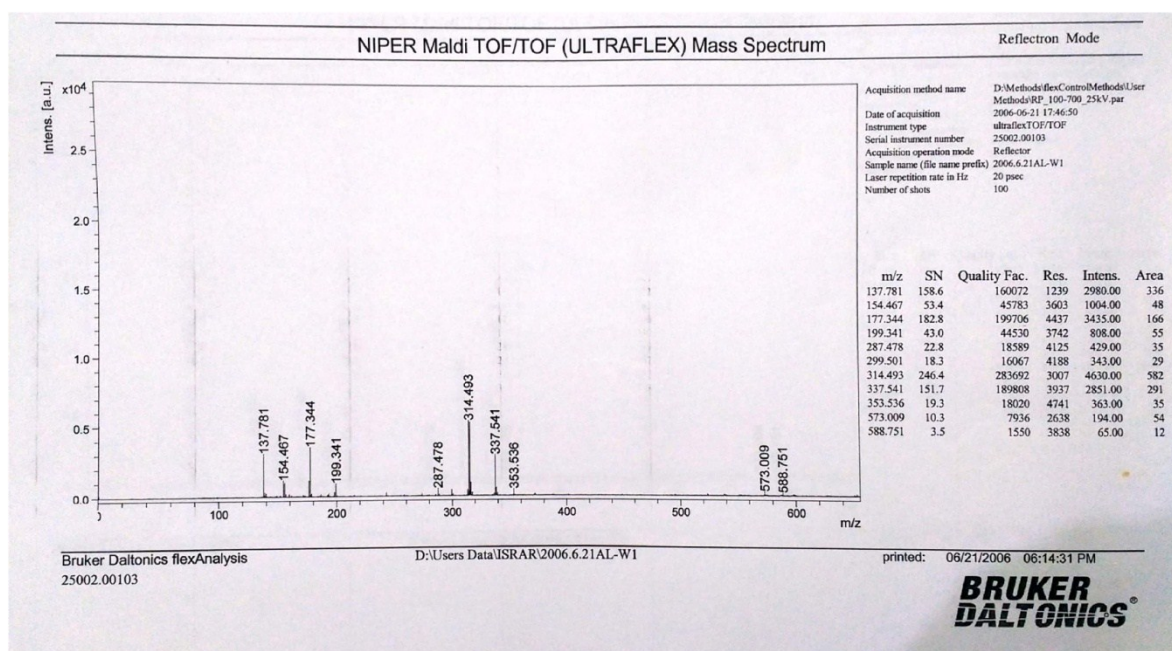

**Supplementary figure 5:** Mass spectra of compound

**Supplementary table 1:** 1D NMR spectral data of Compound WC-1.

| Position | <sup>1</sup> H NMR                | <sup>1</sup> H NMR <sup>56</sup>             | <sup>13</sup> C- NMR | <sup>13</sup> C- NMR <sup>56</sup> |
|----------|-----------------------------------|----------------------------------------------|----------------------|------------------------------------|
| 1        | -                                 |                                              | -                    |                                    |
| 2        | -                                 |                                              | 161                  | 161.92                             |
| 3        | -                                 |                                              | 154                  | 154.45                             |
| 4        | -                                 |                                              | 100.8                | 101.38                             |
| 5        | -                                 |                                              | 153                  | 154.45                             |
| 6        | 6.38 ( <i>d</i> , <i>J</i> = 2.0) | 6.62 <i>s</i>                                | 97.1                 | 97.84                              |
| 7        | -                                 |                                              | 158                  | 158.59                             |
| 8        | 6.38 ( <i>d</i> , <i>J</i> = 2.0) | 7.24 <i>s</i>                                | 97.6                 | 98.57                              |
| 9        | -                                 |                                              | 95.8                 | 96.40                              |
| 10       | 7.08 <i>s</i>                     | -                                            | 91.9                 | 92.94                              |
| 11       | -                                 | -                                            | 143.8                | 148.55                             |
| 12       | -                                 | -                                            | 142.7                | 145.10                             |
| 13       | 7.26 <i>s</i>                     | 6.46 <i>s</i>                                | 103                  | 104.24                             |
| 14       | -                                 | -                                            | 157                  | 157.45                             |
| -        | 3.73 <i>s</i> at OCH <sub>3</sub> | 9.82 <i>s</i> at OCH <sub>3</sub>            | 54.2                 | 55.43                              |
| -        | 8.98 <i>brs</i> at 11, 12 (OH)    | 9.34 <i>s</i> , 9.36 <i>s</i> at 11, 12 (OH) | -                    | -                                  |
| -        | 10.58 <i>s</i> at 5 (OH)          | 10.97 <i>s</i> at 5 (OH)                     | -                    | -                                  |
